# Supplementary material
Source: Springer Nature journal article supplement (https://www.springermedizin.de/resource/supplementary/13054_2010_8639_MOESM2_ESM.pdf/9732436)

## Lung

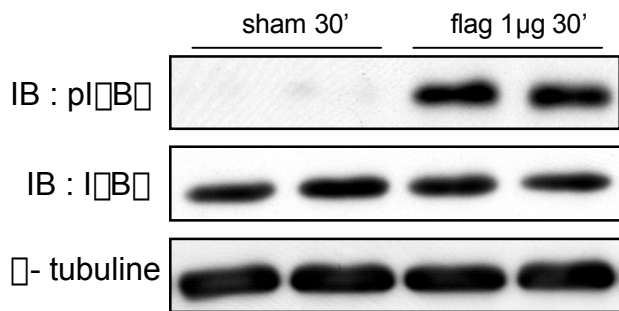

## Liver

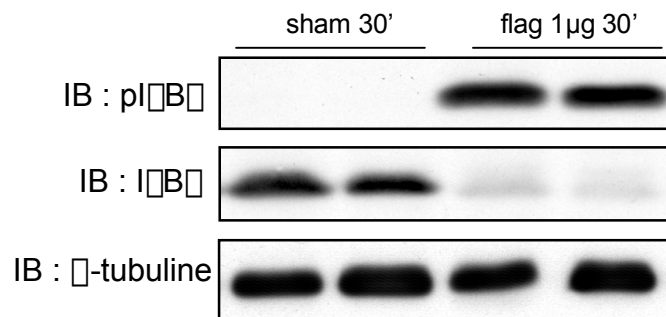

## Gut

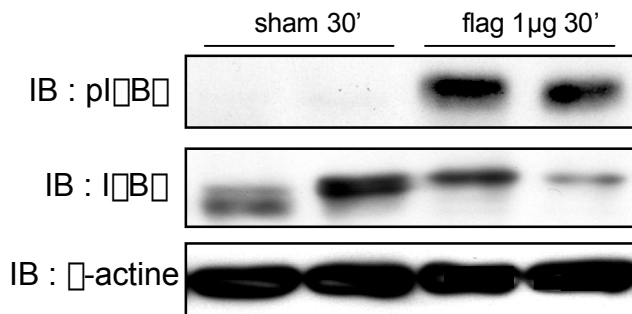

## Kidney

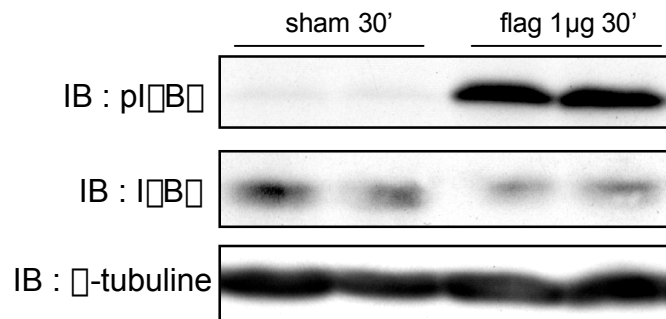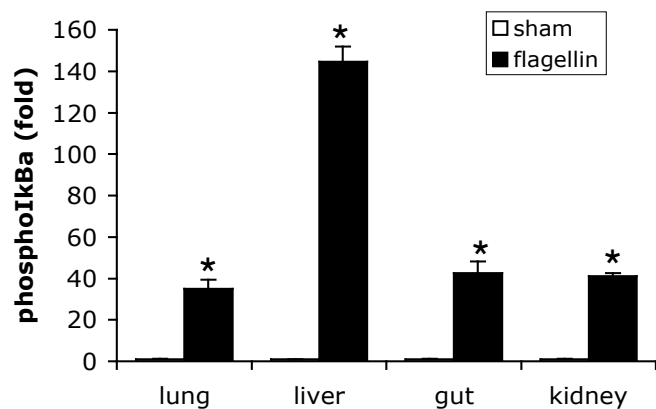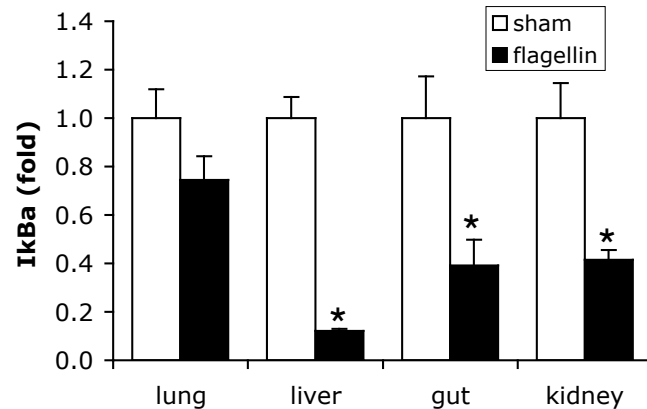

Supplement: MOESM2 [file 9732436]
